# Supplementary material for: Characterization of Bacillus cereus AFA01 Capable of Degrading Gluten and Celiac-Immunotoxic Peptides
Source: MDPI journal article supplement (doi:10.3390/foods10081725), 2021-07-26
Supplement: s1 [file s1]

1 Figure S1

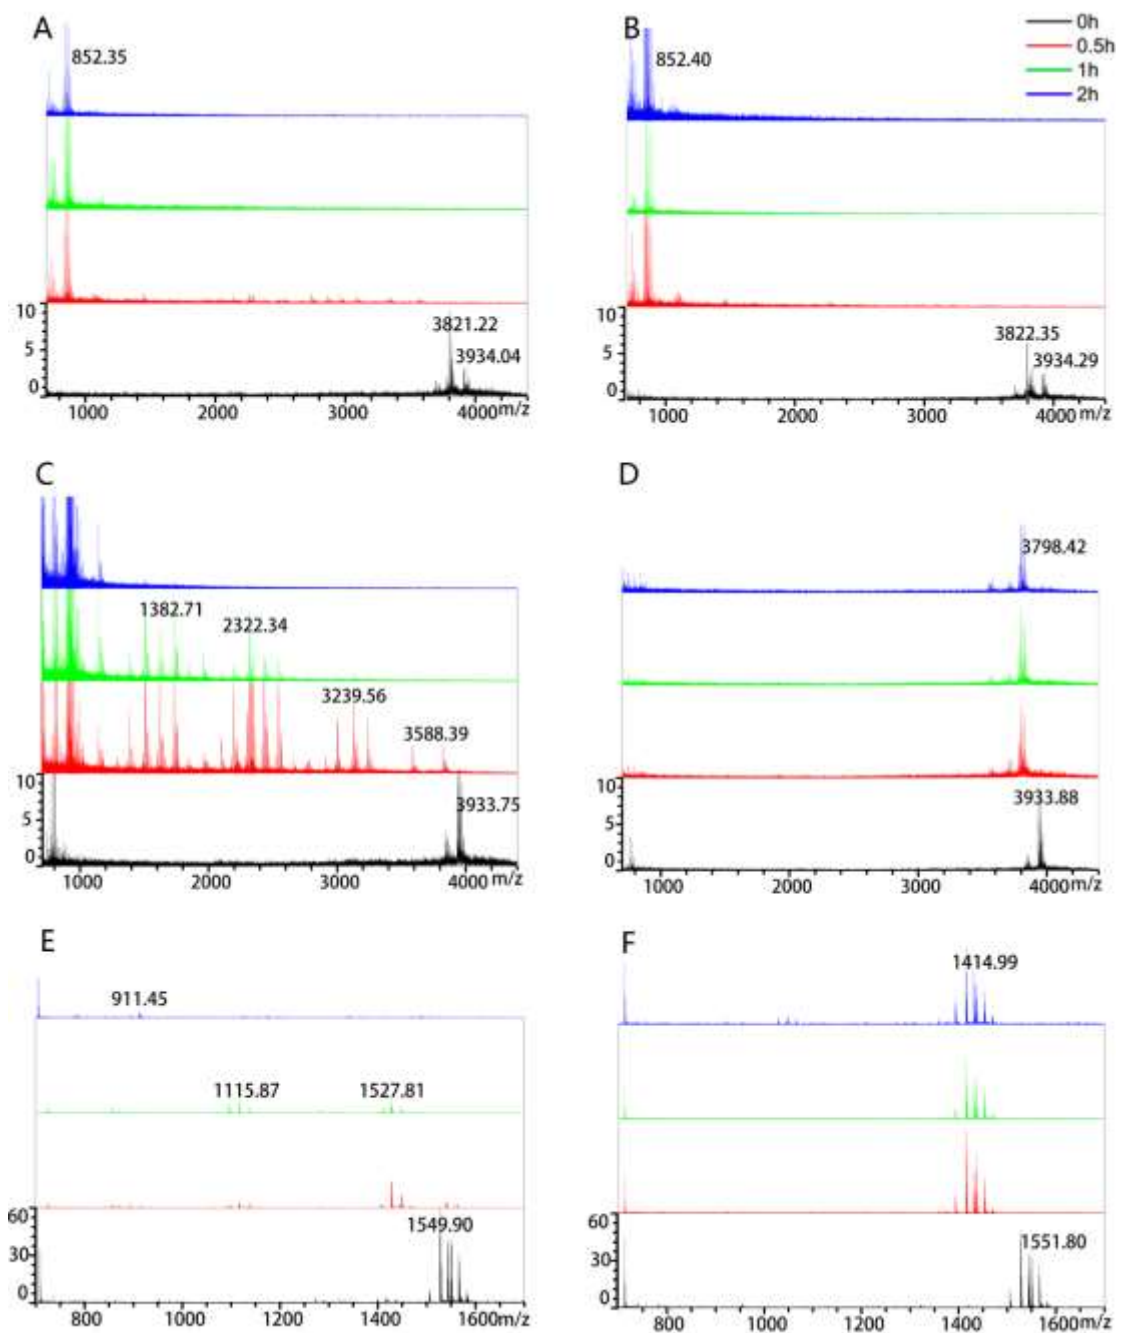

2

3 Figure S1. MALDI-TOF analysis of the degradation profiles of the immunotoxic  
 4 peptides. The cell densities used for the incubations were OD<sub>620</sub> 1.2. The 33-mer (0.5  
 5 mg/mL) gliadin peptide was incubated with *B. cereus* AFA01 from the medium of  
 6 MCG-1 (A), SCB (B), BA (C) or LB (D) for 0, 0.5, 1 and 2 h. The 13-mer gliadin

- 7 peptide (0.25 mg/mL) was incubated with *B. cereus* AFA01 from the medium of BA (E)
- 8 or LB (F) for 0, 0.5, 1 and 2 h, respectively.

9 Table S1 Comparative genome statistics of th *B. cereus*

|                         | CH           | 21155        | AFA01        |
|-------------------------|--------------|--------------|--------------|
| <b>Genome Size (bp)</b> | 6098577      | 6258015      | 5843781      |
| <b>Chromosome No.</b>   | 1            | 1            | 1            |
| <b>Plasmid No.</b>      | 1            | 4            | 4            |
| <b>GC Content(%)</b>    | 34.92        | 34.91        | 35.22        |
| <b>CDS No.</b>          | 6063         | 6362         | 5925         |
| <b>tRNA No.</b>         | 106          | 107          | 107          |
| <b>rRNA No.</b>         | 42           | 42           | 42           |
| <b>Accession</b>        | SAMN17369856 | SAMN17369855 | SAMN17369857 |
